# Supplementary material
Source: PubMed Central journal article supplement (PMC6522293)
Supplement: NIHMS1525740-supplement-1.pdf [file NIHMS1525740-supplement-1.pdf]

Figure S1.

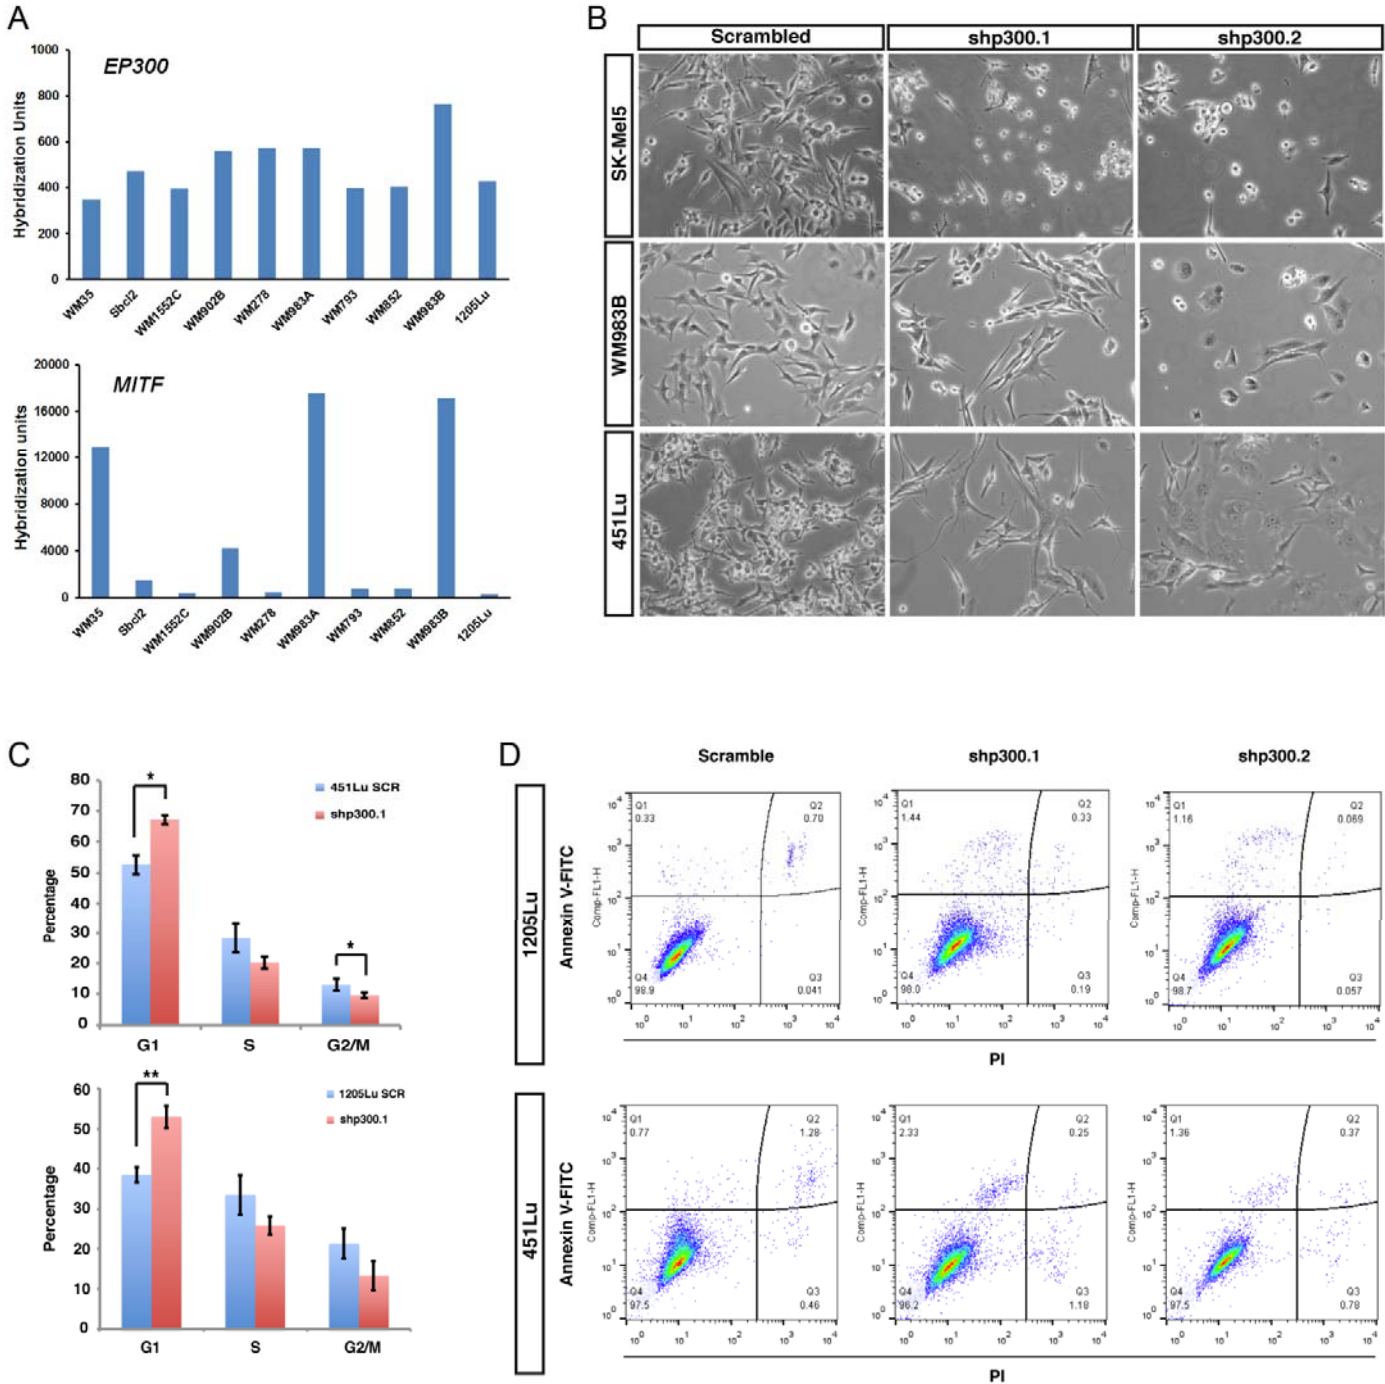

Figure S2.

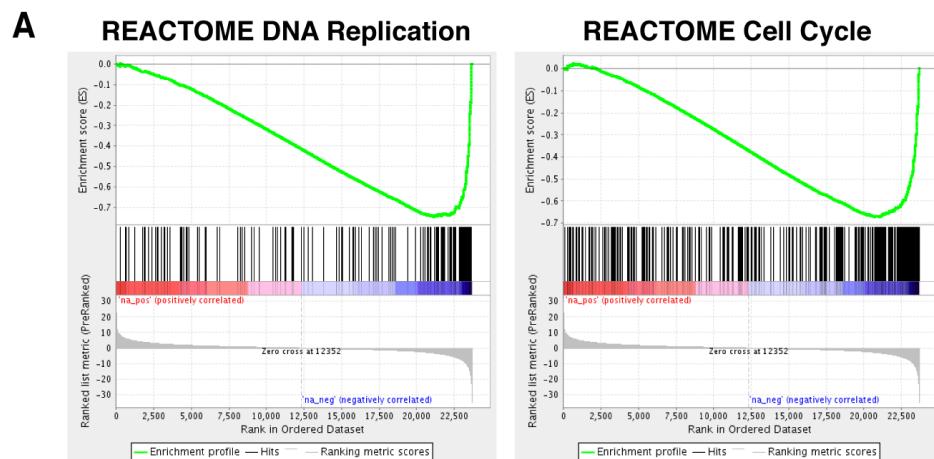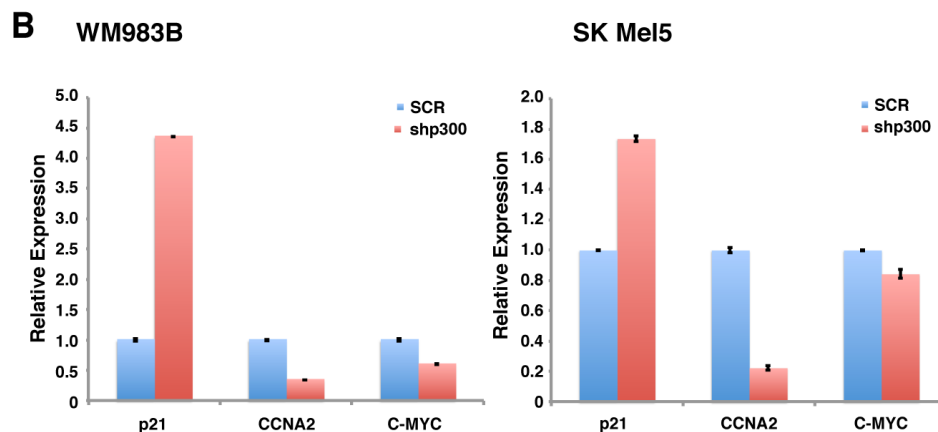

**C**

**MITF Target Genes**

**shp300**

Log2 fold change  
-5    0    5

|               | SK Mel5 | WM983B |                | SK Mel5 | WM983B |
|---------------|---------|--------|----------------|---------|--------|
| <b>AURKB</b>  | -3.333  | -2.813 | <b>MCM4</b>    | -3.337  | -3.368 |
| <b>BEST1</b>  | -3.531  | -3.247 | <b>MCM5</b>    | -3.038  | -5.047 |
| <b>BRCA1</b>  | -3.439  | -5.245 | <b>MCM6</b>    | -2.542  | -3.982 |
| <b>CCNB1</b>  | -3.608  | -2.127 | <b>NCAPD3</b>  | -2.124  | -2.739 |
| <b>CDCA3</b>  | -2.402  | -2.599 | <b>NUF2</b>    | -4.3    | -2.513 |
| <b>CDCA8</b>  | -2.658  | -2.024 | <b>ORC6</b>    | -3.488  | -2.741 |
| <b>CENPF</b>  | -3.028  | -2.572 | <b>PLK1</b>    | -4.26   | -2.618 |
| <b>CENPH</b>  | -3.304  | -4.894 | <b>POLE2</b>   | -3.358  | -4.649 |
| <b>CEP55</b>  | -3.872  | -2.703 | <b>RFC5</b>    | -2.571  | -2.973 |
| <b>DCT</b>    | -2.681  | -8.525 | <b>RPA3</b>    | -2.217  | -3.107 |
| <b>DSN1</b>   | -2.035  | -2.829 | <b>SEMA6A</b>  | -3.726  | -2.672 |
| <b>ESPL1</b>  | -2.27   | -2.622 | <b>SLC19A2</b> | -10.235 | -4.253 |
| <b>HPGD</b>   | -5.574  | -3.587 | <b>SPAG5</b>   | -5.012  | -3.06  |
| <b>KIF20A</b> | -3.815  | -2.792 | <b>SPC25</b>   | -3.285  | -5.897 |
| <b>KIF4A</b>  | -3.322  | -2.01  | <b>TACC3</b>   | -2.625  | -2.343 |
| <b>MCM2</b>   | -2.114  | -3.66  | <b>TPX2</b>    | -3.319  | -2.409 |
|               |         |        | <b>UBE2C</b>   | -2.53   | -2.138 |

Figure S3.

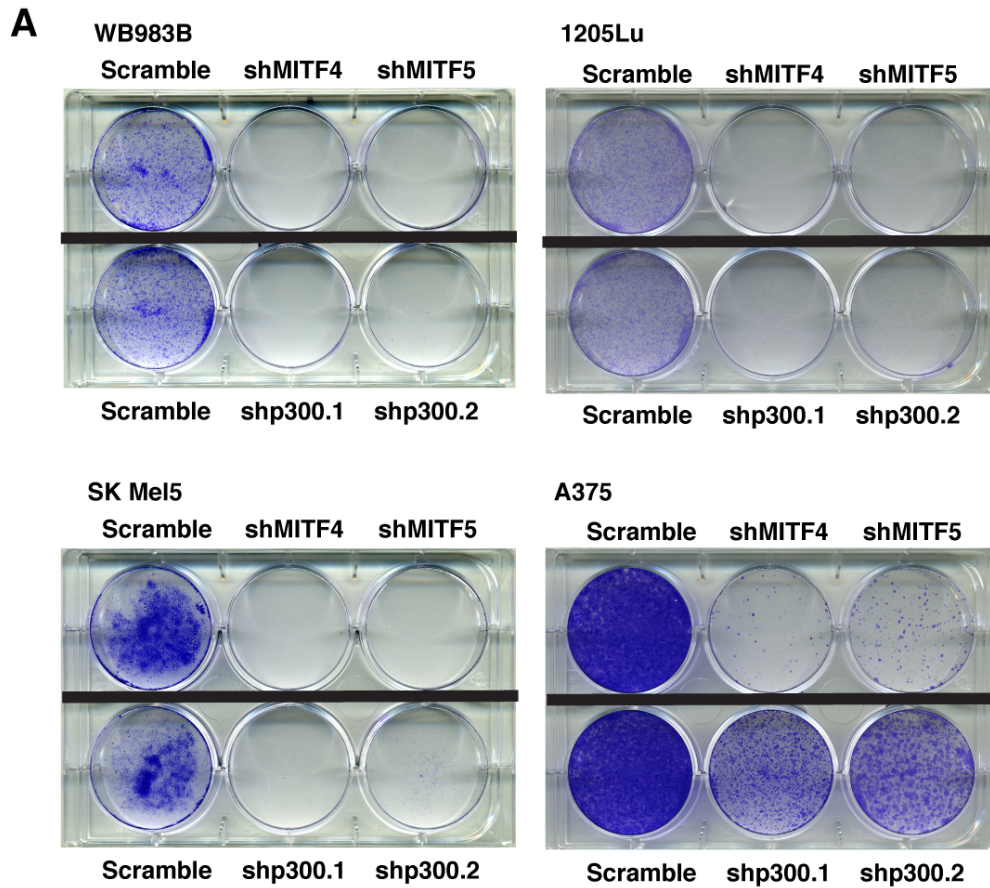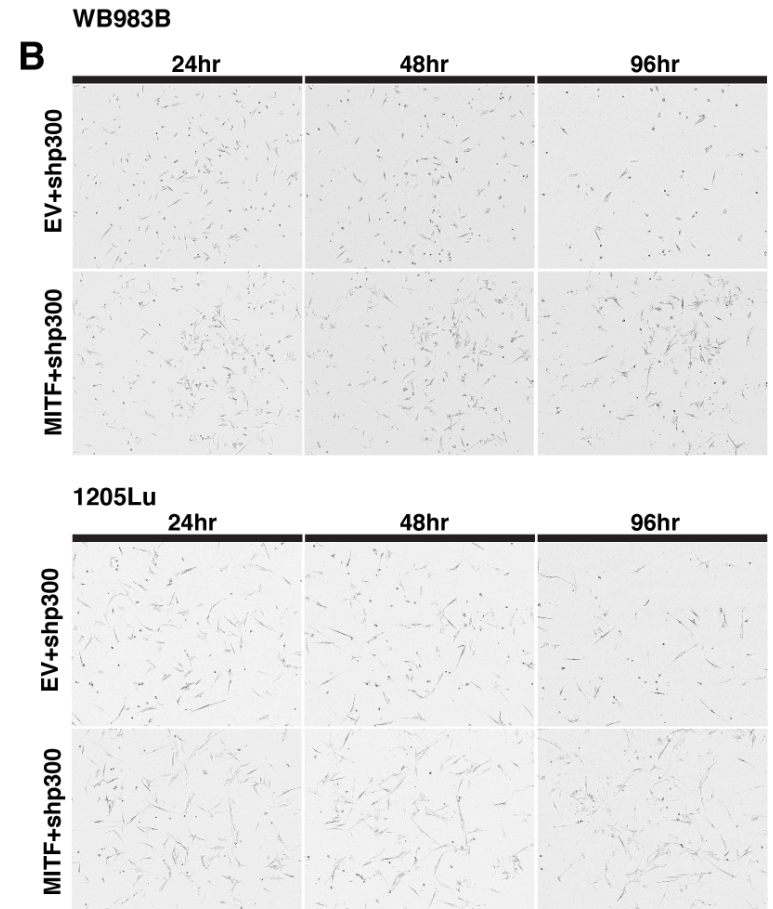

Figure S4

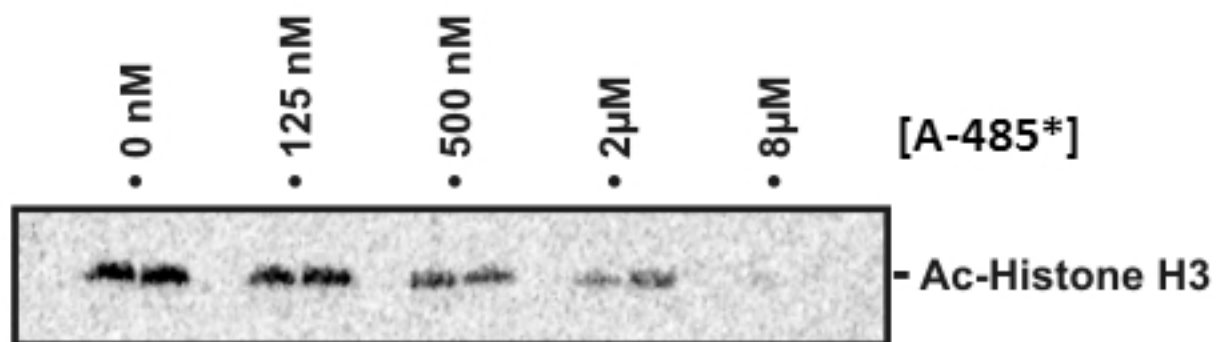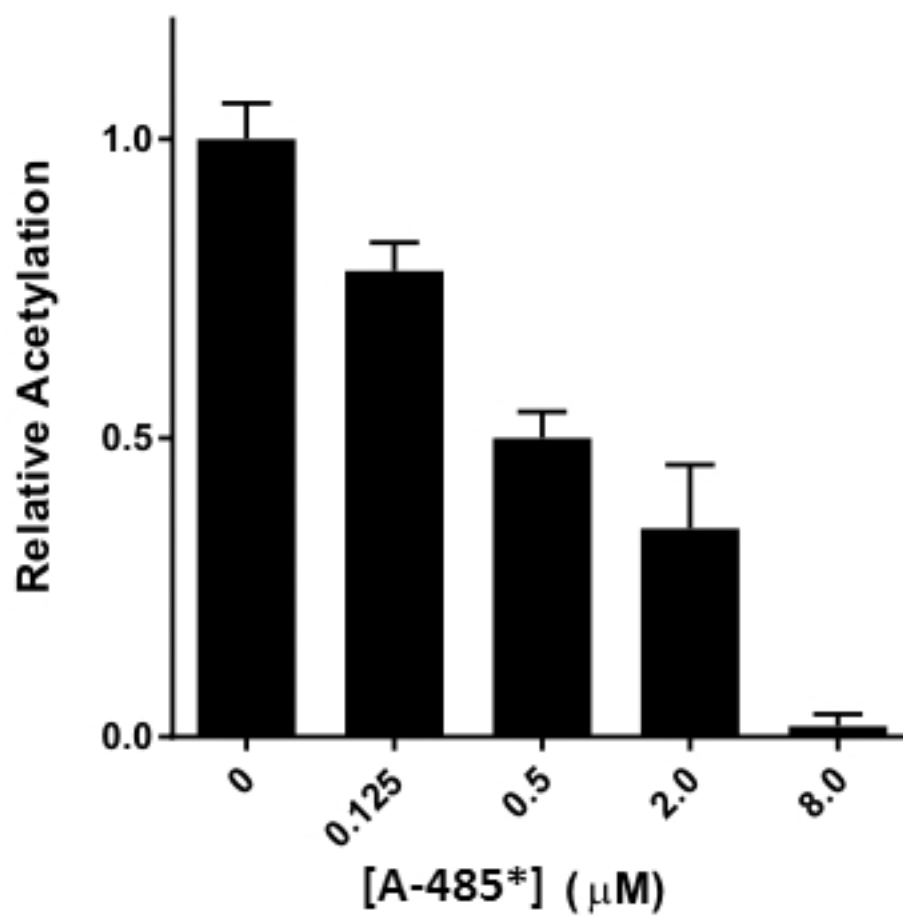

Figure S5

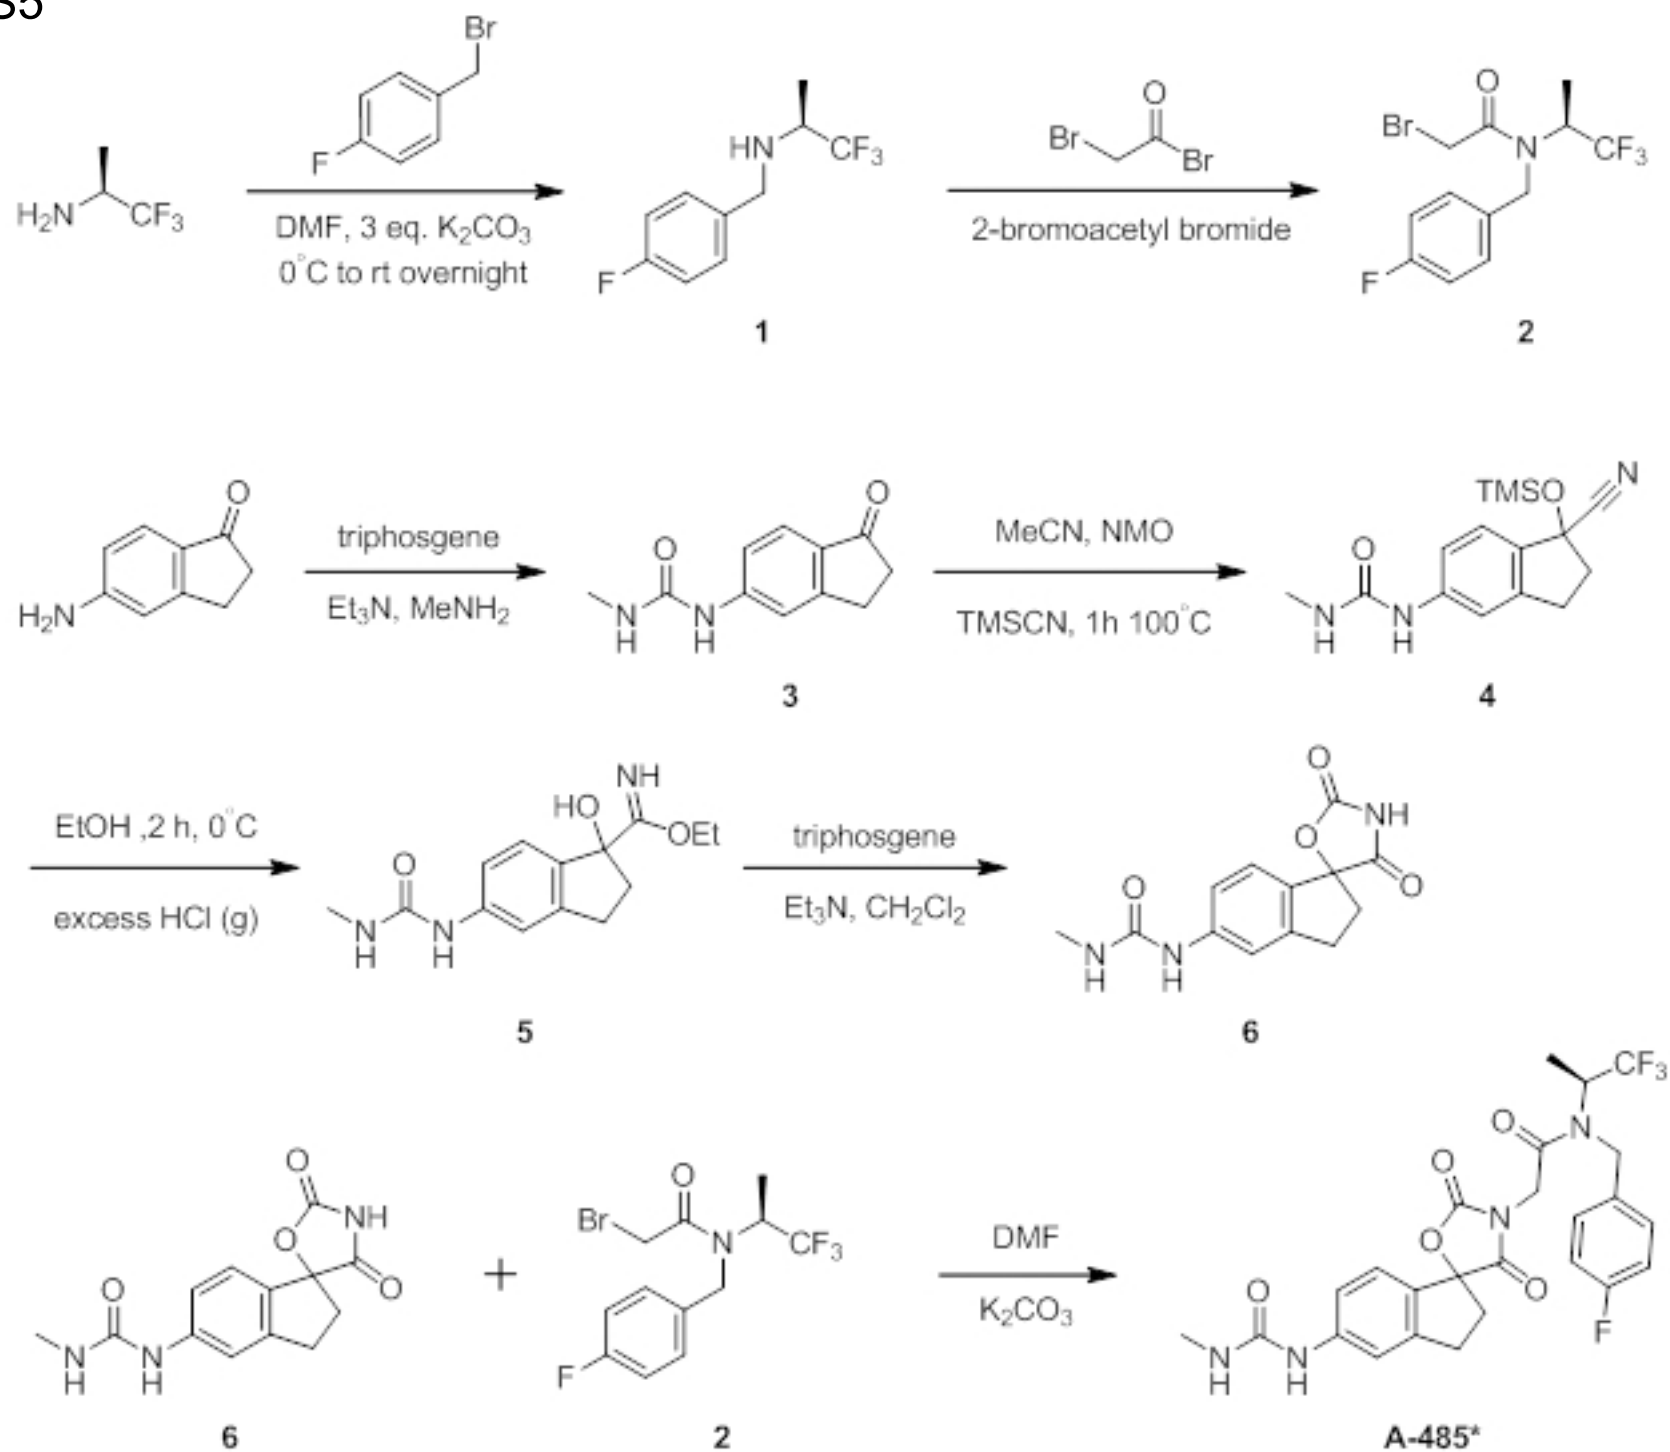

**Table S1. ChIP-PCR primer sequences for the characterization of *MITF* gene upstream regulatory region**

| Primer ID | Forward                         | Reverse                          |
|-----------|---------------------------------|----------------------------------|
| 1         | 5'-TCTACTAATGTATAATCGTGTGTT-3'  | 5'-ATGAGATCATGTTTCTAACGG-3'      |
| 2         | 5'-TGCTAAGGCCGTTAGAAAC-3'       | 5'-GCCCTCATCTCCTAGCATA-3'        |
| 3         | 5'-CTGGATTTGGACTAATTTCTCA-3'    | 5'-CCAGGTTTAAAGATCCGATG-3'       |
| 4         | 5'-GTTTGGATTGCCAGCTAC-3'        | 5'-CCAGAGGACACACATCTAT-3'        |
| 5         | 5'-AAAGACCTCACTGACAGT-3'        | 5'-ATGAGGGCAATGAGTAGTT-3'        |
| 6         | 5'-ACATTCTACTCATTGCCCTC-3'      | 5'-TTGTCTAAATGCCCAGGATAA-3'      |
| 7         | 5'-ATTGTCAACCTAACGGACT-3'       | 5'-ATGCTTAATATCTACTGCTGAC-3'     |
| 8         | 5'-TTGTCAGCAGTAGATATTAAGCA-3'   | 5'-GCTAAACTGTACAAAGCA-3'         |
| 9         | 5'-TGCTTTGTACAGTGTTTAGC-3'      | 5'-TACAGAAGAATGAGTTATCATATACA-3' |
| 10        | 5'-ATGATAACTCATTCTTCTGTAATCT-3' | 5'-CTGCCTATTGACCTCACA-3'         |
| 11        | 5'-TGTGAGGTCAATAGGCAG-3'        | 5'-TTTCCATGGCCGAATAAC-3'         |
| 12        | 5'-TCGGCCATTGGAAAAGT-3'         | 5'-GACGAGCTATCAAAGTCAAAC-3'      |
| 13        | 5'-ATAGCTCGTCACTTAAAAAGG-3'     | 5'-CGGAACTTTAGCACAGAAG-3'        |
